# Supplementary material for: Achievements and Challenges in Controlling Coffee Leaf Rust (Hemileia vastatrix) in Hawaii
Source: MDPI journal article supplement (doi:10.3390/agrochemicals3020011), 2024-03-31
Supplement: s1 [file s1]

## Supplementary data S1

Coffee leaf rust incidence (%) at three coffee farms from South Kona District of Hawaii Island. Data correspond to coffee season 2021 and 2022.

| Season | Farm | Jan–Feb | Mar–Apr | May–Jun | Jul–Aug | Sep–Oct | Nov–Dec |
|--------|------|---------|---------|---------|---------|---------|---------|
| 2021   | 1    | 3.7     | 3.8     | 1.7     | 7.2     | 48.4    | 76.7    |
|        | 2    | 0.9     | 2.2     | 0.7     | NA      | 16.1    | 21.2    |
|        | 3    | 0       | 2.3     | 2.2     | 2.3     | 3.2     | 5.8     |

| Season | Farm | Jan  | Feb  | Mar  | Abr  | May  | Jun | Jul | Aug  | Sep  | Oct  | Nov  | Dec  |
|--------|------|------|------|------|------|------|-----|-----|------|------|------|------|------|
| 2022   | 1    | 76.6 | 66.5 | 44.5 | 15.5 | 11.4 | 10  | 5.9 | 18.6 | 14.2 | 12.7 | 20.3 | 43.2 |
|        | 2    | 19.5 | 3    | 1    | 0.3  | 0.33 | 0.3 | 0.6 | 0.9  | 1.7  | 3.8  | 17.6 | 20   |
|        | 3    | 5.8  | 3    | 2.9  | 0.2  | 0.3  | 5   | 3.4 | 2.9  | 1    | 0.5  | 0.6  | 3.1  |
