# Supplementary material for: Achievements and Challenges in Controlling Coffee Leaf Rust (Hemileia vastatrix) in Hawaii
Source: MDPI journal article supplement (doi:10.3390/agrochemicals3020011), 2024-03-31
Supplement: s1 [file s1]

## Supplementary data S2

Number of the coffee leaves per branch at three coffee farms from South Kona District of Hawaii Island. Data correspond to coffee season 2021 and 2022.

| Season | Farm | Jan-Feb | Mar-Apr | May-Jun | Jul-Aug | Sep-Oct | Nov-Dec |
|--------|------|---------|---------|---------|---------|---------|---------|
| 2021   | 1    | 15.4    | 16      | 18.7    | 17      | 16.8    | 11.1    |
|        | 2    | 16.6    | 15.4    | 18.5    | NA      | 22      | 19.8    |
|        | 3    | 21.3    | 20.8    | 16.7    | 18.5    | 19.7    | 20.7    |

| Season | Farm | Jan  | Feb  | Mar  | Abr  | May  | Jun  | Jul   | Aug  | Sep  | Oct  | Nov  | Dec  |
|--------|------|------|------|------|------|------|------|-------|------|------|------|------|------|
| 2022   | 1    | 8.3  | 6.7  | 6.2  | 7.7  | 8.1  | 8.4  | 14.4  | 10.3 | 11.8 | 12   | 12.9 | 11.4 |
|        | 2    | 18.3 | 16.8 | 16.5 | 18.7 | 17.8 | 16.7 | 16.6  | 16.2 | 16.3 | 16.5 | 15.6 | 14.6 |
|        | 3    | 19.5 | 18.3 | 17.2 | 17.3 | 17.4 | 18.5 | 19.14 | 21   | 19.8 | 19.3 | 18.7 | 18.3 |
